# Supplementary material for: β-Defensin versus conventional markers of inflammation in periprosthetic joint infection: a retrospective study
Source: PeerJ journal article supplement (doi:10.7717/peerj.18560), 2024-11-18
Supplement: Raw_data.xlsx [file Raw_data.xlsx]

## Sheet: Raw data
Age	Sex_dicot	DEFB1_conc	PJI	ESR	CRP	WBC	Joint_dic
93	Female	817.5	Positive	32	16.7	11.1	Left hip
92	Female	1006	Negative	5	2.3	4.9	Right hip
92	Female	1237.5	Positive	27	17.3	8.3	Left hip
90	Female	2947.5	Positive	33	19.8	12.2	Left hip
84	Female	398	Negative	1	1	6.4	Left hip
84	Female	685.8	Negative	1	1.2	7.8	Left hip
83	Male	600	Negative	5	0.4	7.2	Right hip
83	Female	1499	Positive	17	5.2	6.2	Right hip
82	Male	878	Negative	4	0	5.4	Right hip
82	Male	585.1	Positive	24	3.3	9.5	Left hip
80	Female	1022	Negative	7	2.4	8.6	Right knee
80	Female	2245	Positive	9	18	10.6	Right hip
79	Male	444.3	Negative	0	0.1	8	Left hip
79	Male	2450	Positive	9	11.7	8.9	Left knee
78	Male	1475.8	Positive	2	0.09	7.4	Left knee
78	Female	298	Negative	9	1.1	5.9	Left hip
78	Female	1989	Positive	24	11.1	11.1	Left hip
77	Male	2366.6	Positive	18	19	7.7	Left hip
77	Male	447.4	Negative	4	1.1	6.8	Right hip
77	Male	501	Negative	5	1.1	6.9	Left hip
76	Male	669	Negative	2	1.14	6.6	Left hip
76	Male	1012	Negative	3	2	5.4	Left hip
76	Male	1087	Negative	8	2	7.4	Right hip
75	Male	335.8	Negative	2	3.1	5.9	Right hip
74	Male	847	Negative	5	1.8	7	Left hip
74	Male	440.9	Negative	4	1.7	6.6	Left hip
74	Male	1879	Positive	14	5.7	7.9	Left knee
74	Female	123	Negative	26	4.9	11.5	Left hip
74	Male	1478	Positive	14	7	9.9	Left hip
73	Female	1529.2	Positive	12	1.25	6.6	Left knee
72	Female	1536.3	Positive	12	1.25	6.6	Left knee
72	Female	1600	Positive	2	2.2	4.3	Left hip
70	Male	445.8	Negative	1	0.3	4.9	Left hip
70	Male	444.3	Negative	10	5.1	5.6	Left hip
70	Male	240.5	Negative	5	1	6.6	Right hip
70	Female	987	Negative	16	6.6	8.1	Left hip
70	Female	1050	Negative	7	1	6.9	Left hip
70	Female	1575.5	Positive	16	9.9	9.2	Left hip
69	Male	1712.5	Positive	12	13.1	8.6	Right knee
69	Female	2781.3	Positive	24	8.9	7.8	Left hip
69	Female	2200	Positive	26	9.1	8.2	Right knee
68	Female	699	Positive	17	11.8	8.4	Right knee
66	Female	863.8	Positive	17	6.5	4.2	Right hip
66	Male	641	Negative	3	2.1	7.1	Right hip
66	Male	1769	Positive	5	5.8	8	Right knee
65	Female	2452.5	Positive	42	15.8	9	Right hip
65	Female	2887.5	Positive	19	29.2	12.1	Left hip
65	Male	1983.8	Positive	13	6.9	8.8	Right knee
64	Female	2879	Positive	42	18.4	8	Right hip
63	Male	589	Negative	5	0	7.1	Right hip
60	Female	1411	Positive	10	1.9	6.7	Right knee
59	Female	2441	Positive	14	9.8	8.9	Right knee
59	Male	2001.2	Positive	8	5.1	9.1	Right knee
58	Female	1563.8	Positive	38	15.2	9.1	Right hip
57	Female	1011	Negative	2	0.18	4.8	Right hip
57	Male	748	Negative	38	3.4	8	Right hip
57	Female	527.4	Positive	20	13.3	8.8	Left knee
57	Female	665	Negative	6	0.71	4.2	Right knee
57	Female	1666	Positive	5	2.23	12.3	Left knee
56	Male	1210	Negative	1	8.9	6.1	Right hip
56	Female	2450.6	Positive	12	7.9	7.7	Right knee
56	Female	989	Positive	39	10.7	6.9	Left hip
56	Male	489	Negative	30	2.4	11.5	Right knee
55	Female	2355	Positive	22	22.4	7.4	Right hip
53	Female	1400	Negative	11	0.3	8	Right hip
52	Female	523.5	Positive	36	16.2	8.5	Right knee
52	Male	1699	Positive	28	14.9	4.6	Left knee
52	Male	1112	Positive	28	22	14.3	Right knee
52	Male	1699	Positive	28	22	14.3	Right knee
51	Male	2010	Positive	24	15.1	11.1	Right hip
50	Female	654	Negative	8	0.23	5	Right knee
50	Male	1453	Positive	26	21	10.1	Right hip
50	Female	1930	Positive	27	0.6	8.2	Right hip
50	Female	1698	Positive	18	5.9	5.3	Left hip
49	Female	699	Negative	3	0.3	6.3	Left hip
49	Female	1941.2	Positive	20	16.6	8.9	Right hip
48	Female	2311.3	Positive	48	19.3	6.9	Left hip
40	Female	489	Negative	8	1.94	5.9	Right knee
38	Male	1328	Positive	36	9.8	10.5	Right knee
35	Male	1099.7	Negative	0	0	5.5	Right hip
33	Male	501	Negative	2	9	7	Right hip
31	Male	2846.3	Positive	32	19	7.8	Right hip
31	Male	2740	Positive	21	17.2	8.2	Right hip
31	Male	1175.1	Positive	25	10.1	6.6	Right hip
30	Male	2583.75	Positive	28	21.6	9.6	Right knee
30	Male	2755	Positive	16	17.2	8.9	Right hip
30	Male	877	Negative	3	5.4	6.2	Right hip
29	Male	2746.8	Positive	15	22	9.1	Right hip
29	Female	1276.3	Positive	24	13.9	8	Right hip
28	Male	178.2	Negative	0	3.2	7	Left knee
28	Male	879	Negative	12	1.4	12.9	Left knee
28	Male	1741	Positive	8	1	8.4	Left knee
27	Male	2187	Positive	22	18.2	7	Right knee
26	Male	2372	Positive	19	21.7	8.3	Left hip
22	Female	2997.5	Positive	29	20.1	7.2	Left hip
22	Male	1062.8	Positive	64	13.8	9.7	Left hip
21	Female	2989.4	Positive	47	9.9	10	Right hip
21	Male	277.5	Negative	10	0.2	9.5	Right knee
21	Male	2587	Positive	40	16.4	7.6	Left hip
20	Male	841	Negative	2	4.1	6	Right knee
19	Female	2997.5	Positive	14	19.4	8.8	Right hip
18	Male	2100	Positive	12	5.8	4.9	Left hip
16	Female	301	Negative	18	17.2	7	Left knee
14	Female	2997.5	Positive	50	18.9	14	Left hip
13	Male	2376.6	Positive	12	14.2	8.1	Left hip
