# Supplementary material for: β-Defensin versus conventional markers of inflammation in periprosthetic joint infection: a retrospective study
Source: PeerJ journal article supplement (doi:10.7717/peerj.18560), 2024-11-18
Supplement: STROBE.doc [file STROBE.doc]

STROBE Statement—Checklist of items that should be included in reports of ***case-control studies***

|  | Item No | Recommendation |
| --- | --- | --- |
| **Title and abstract** | 1 | (*a*) Indicate the study’s design with a commonly used term in the title or the abstract. Rretrospective study, 64 patients were defined as positive for PJI and the remaining 41 were negative (page 2, lines 42, 45 and 46). |
| (*b*) Provide in the abstract an informative and balanced summary of what was done and what was found. The efficacy of β-defensin as a diagnostic marker for PJI was evaluated by comparing its performance with that of ESR, CRP and WBC count (page 2, lines 40 and 41). The β-defensin performed better than the other markers for the diagnosis of PJI (page 2, lines 58 and 59). |
| Introduction | | |
| Background/rationale | 2 | Explain the scientific background and rationale for the investigation being reported. The most commonly used inflammatory markers in PJI are ESR, CRP, and total WBC. However, they are nonspecific (page 3, lines 76 and 77; 84 and 85). Human β-defensin 1 is an antimicrobial peptide that is elevated in infections (page 3, lines 93-95), but its diagnostic value in PJI has not been evaluated (page 3, lines 97 and 98). |
| Objectives | 3 | State specific objectives, including any prespecified hypotheses. a) to determine the efficacy of β-defensin as a diagnostic marker for PJI in joint fluid; b) to compare the performance of β-defensin with ESR, CRP, and WBC in diagnosing PJI; and c) to establish cut-off values for β-defensin, ESR, CRP, and WBC in the diagnosis of PJI (page 3, lines 98-101). |
| Methods | | |
| Study design | 4 | Present key elements of study design early in the paper. As described at the beginning of the Study Setting and Participants section, the design of this study was a single-center retrospective study (page 3, line 105). |
| Setting | 5 | Describe the setting, locations, and relevant dates, including periods of recruitment, exposure, follow-up, and data collection. This study was conducted between October 2022 and June 2023 at the Instituto Nacional de Rehabilitación Luis Guillermo Ibarra Ibarra, in Mexico City, Mexico (page 3, lines 108 and 109). |
| Participants | 6 | (*a*) Give the eligibility criteria, and the sources and methods of case ascertainment and control selection. Give the rationale for the choice of cases and controls. According to Musculoskeletal Infection Society (MSIS) criteria, 64 patients were defined as positive for PJI and the remaining 41 were negative (pages 3 and 4, lines 110-112). |
| (*b*)For matched studies, give matching criteria and the number of controls per case. N/A |
| Variables | 7 | Clearly define all outcomes, exposures, predictors, potential confounders, and effect modifiers. Give diagnostic criteria, if applicable. For this study, sex and possibly age were identified as possible confounders. In addition, we performed linear regression to evaluate the effect of each of the markers of inflammation and β-defensins (page 5, lines 160 and 161). |
| Data sources/ measurement | 8* | For each variable of interest, give sources of data and details of methods of assessment (measurement). Describe comparability of assessment methods if there is more than one group. Aspirates were classified as PJI and non-PJI (MSIS criteria) (pages 3 and 4, lines 110-112). Patients' clinical histories were reviewed, and routine diagnostic laboratory tests were performed, including CRP, ESR, WBC count, and microbiological culture. Serum CRP levels were quantified by an automated turbidimetric method using Beckman Coulter AU480 equipment (USA) (page 4, lines 125-129). β-Defensins were quantified by ELISA and the absorbances were read at 450 nm (page 4, lines 148-151). All samples were microbiologically cultured using the Vitek System to identify pathogens (page 4, lines 133-145). |
| Bias | 9 | Describe any efforts to address potential sources of bias. To minimize possible sources of bias, samples were rigorously processed according to well-established criteria (MSIS) (pages 3 and 4, lines 110-111). |
| Study size | 10 | Explain how the study size was arrived at. All specimens from patients over 18 years of age were processed, and those that met certain criteria were frozen pending processing (page 4, lines 129-130). The number of samples processed depended on laboratory supplies. Therefore, we estimated that we could process between 100 and 110 samples in total (in our case, there were 105 in total). |
| Quantitative variables | 11 | Explain how quantitative variables were handled in the analyses. If applicable, describe which groupings were chosen and why. All quantitative variables were analyzed with parametric statistics; among these variables are age, β-defensins, ESR, CRP and WBC count (pages 4 and 5, lines 157-159; page 5, lines 170-173). |
| Statistical methods | 12 | (*a*) Describe all statistical methods, including those used to control for confounding. Demographic data and baseline clinical parameters of patients with PJI were represented as mean ± standard deviation (SD) for quantitative data, while categorical data were described using frequencies and proportions (pages 4 and 5, lines 155-166). |
| (*b*) Describe any methods used to examine subgroups and interactions. Variables showing statistical significance in univariate analysis were included in multivariate analysis using a logistic regression model (page 5, lines 160-161) |
| (*c*) Explain how missing data were addressed. N/A |
| (*d*) If applicable, explain how matching of cases and controls was addressed. N/A |
| (*e*) Describe any sensitivity analyses. Sensitivity and specificity values for β-defensin, ESR, CRP, and WBC were calculated using receiver operating characteristic (ROC) curves, and the area under the curve (AUC) was estimated. Cut-off points were calculated using the Youden index. Positive and negative likelihood ratios (+LR and –LR) were calculated using the Diagnostic Test Calculator tool (page 5, lines 161-166). |
| Results | | |
| Participants | 13* | (a) Report numbers of individuals at each stage of study—eg numbers potentially eligible, examined for eligibility, confirmed eligible, included in the study, completing follow-up, and analysed. After a rigorous selection criterion, 64 patients were included as positive for PJI (cases) and the remaining 41 included as non-PJI (controls) (page 4, lines 111-112; page 5, lines 173-174, and 176). |
| (b) Give reasons for non-participation at each stage. Participants who were not older than 18 years of age and who did not meet the criteria for MSIS were not included in the study (page 4, line 111). |
| (c) Consider use of a flow diagram. N/A |
| Descriptive data | 14* | (a) Give characteristics of study participants (eg demographic, clinical, social) and information on exposures and potential confounders. A total of 105 clinical isolates were collected. The mean age of participants was 56.6 ± 21.4 years, with 50 women (47.6%) and 55 men (52.4%). Laboratory variables included β-defensin levels at 1434.1 ± 838.0 pg/mL, ESR at 16.5 ± 13.3 mm/h, CRP at 8.6 ± 7.6 mg/L, and WBC at 7.9 ± 2.1 x 10³/mm³. Microbiological culture results were negative in 41 samples (39.1%) and positive in 64 samples (60.9%). The most commonly affected joints with positive cultures were the left hip (34.3%), right hip (33.3%), right knee (21.0%), and left knee (11.4%) (page 5, lines 169-175). |
| (b) Indicate number of participants with missing data for each variable of interest. N/A. |
| Outcome data | 15* | Report numbers in each exposure category, or summary measures of exposure. β-Defensin levels were significantly higher in the PJI group compared to the non-PJI group (1923.0 ± 690.5 vs. 671.0 ± 309.2 pg/mL, p < 0.0001). Similarly, ESR (22.6 ± 12.5 vs. 7.12 ± 8.1 mm/h, p < 0.0001), CRP (12.6 ± 6.9 vs. 2.4 ± 3.2 mg/L, p < 0.0001), and WBC (8.6 ± 2.1 vs. 6.9 ± 1.8 x 10³/mm³, p < 0.001) were significantly higher in the septic group. The most commonly isolated pathogens were *Staphylococcus aureus* (28.1%), *Pseudomonas aeruginosa* (28.1%), and *Staphylococcus epidermidis* (10.9%) (page 5, lines 176-182). |
| Main results | 16 | (*a*) Give unadjusted estimates and, if applicable, confounder-adjusted estimates and their precision (eg, 95% confidence interval). Make clear which confounders were adjusted for and why they were included. Variables that were statistically significant in univariate analysis were used as independent variables, with PJI categorized as the dependent variable (No = 0, Yes = 1) for multivariate logistic regression analysis. The results showed that β-defensin (OR = 1.008, 95% CI = 1.003–1.012, p = 0.001), ESR (OR = 1.163, 95% CI = 1.012–1.336, p = 0.034), and CRP (OR = 1.427, 95% CI = 1.071–1.903, p = 0.015) were associated with PJI (page 5, lines 183-187). |
| (*b*) Report category boundaries when continuous variables were categorized. PJI group: Age (years), 32.2 to 75.2; β-defensin (pg/mL), 1233 to 2613; ESR (mm/h), 10.1 to 35.1; CRP (mg/L), 5.7 to 19.5, and WBC (103/mm3), 6.5 to 10.7. For non-PJI group: Age (years), 40.5 to 81.7; β-defensin (pg/mL), 361.8 to 980.2; ESR (mm/h), -0.98 to 15.2; CRP (mg/L), -0.8 to 5.9, and WBC (103/mm3), 5.1 to 8.7 (by adding and subtracting the standard deviation of each variable, the maximum and minimum ranges were calculated page 5, lines 170-173). |
| (*c*) If relevant, consider translating estimates of relative risk into absolute risk for a meaningful time period. N/A. |

| Other analyses | 17 | Report other analyses done—eg analyses of subgroups and interactions, and sensitivity analyses. To evaluate the performance of β-defensin, ESR, CRP, and WBC for PJI, a ROC diagnostic analysis was conducted. The AUCs were 0.948 (0.909–0.987) for β-defensin, 0.884 (0.811–0.956) for ESR, 0.902 (0.842–0.962) for CRP, and 0.767 (0.670–0.864) for WBC. The combined AUC for β-defensin, ESR, CRP, and WBC was 0.994 (0.989–0.999). The diagnostic cut-off values were 1105.8 pg/mL for β-defensin, 11.5 mm/h for ESR, 5.5 mg/L for CRP, and 7.3 x 10³/mm³ for WBC (page 5, lines 188-193). |
| --- | --- | --- |
| Discussion | | |
| Key results | 18 | Summarise key results with reference to study objectives. Our results demonstrated that β-defensin had higher sensitivity and specificity than ESR, CRP, and WBC. β-Defensin, ESR, and CRP were significantly associated with PJI. To our knowledge, there are no previous reports on using β-defensin as a diagnostic biomarker for PJI (page 6, lines 222-225). |
| Limitations | 19 | Discuss limitations of the study, taking into account sources of potential bias or imprecision. Discuss both direction and magnitude of any potential bias. This was a single-center retrospective study with inherent biases, such as a small sample size and potential inaccuracies in case information. These results should be interpreted with caution, as the significance may vary with a larger sample size. Additionally, there is a risk of sample contamination after aspiration, which could lead to false positives (page 6, lines 243-247). |
| Interpretation | 20 | Give a cautious overall interpretation of results considering objectives, limitations, multiplicity of analyses, results from similar studies, and other relevant evidence. Other molecules or methods with high sensitivity and specificity have been tested. For instance, α-defensin has shown high sensitivity and specificity (~100% and 95%, respectively). Some studies suggest biopsy as the first line of diagnosis for PJI because of its superior sensitivity to aspiration and CRP in diagnosing PJI; however, it is more invasive and offers no advantage over aspiration in terms of bacteriologic accuracy, often resulting in more false-positive results (page 6, lines 225-233). |
| Generalisability | 21 | Discuss the generalisability (external validity) of the study results. The β-defensin assay has higher sensitivity and specificity compared to ESR, CRP, and WBC, suggesting its significant potential as a diagnostic marker for PJI. Although not a perfect test, β-defensin could be considered a valuable tool within the existing diagnostic criteria for PJI. Moreover, the simultaneous determination of multiple markers may enhance diagnostic confidence (page 7, lines 250-254). |
| Other information | | |
| Funding | 22 | Give the source of funding and the role of the funders for the present study and, if applicable, for the original study on which the present article is based. N/A |

*Give information separately for cases and controls.

**Note:** An Explanation and Elaboration article discusses each checklist item and gives methodological background and published examples of transparent reporting. The STROBE checklist is best used in conjunction with this article (freely available on the Web sites of PLoS Medicine at http://www.plosmedicine.org/, Annals of Internal Medicine at http://www.annals.org/, and Epidemiology at http://www.epidem.com/). Information on the STROBE Initiative is available at http://www.strobe-statement.org.
