# Supplementary material for: β-Defensin versus conventional markers of inflammation in periprosthetic joint infection: a retrospective study
Source: PeerJ journal article supplement (doi:10.7717/peerj.18560), 2024-11-18
Supplement: Supplementary_Table_1.docx [file Supplementary_Table_1.docx]

**Supplementary Table 1.** Diagnosis of PJI according to MSIS criteria [Ref. 19]

| One of the following must be met for diagnosis of PJI: |
| --- |
| 1. A sinus tract communicating with the prosthesis |
| 1. A pathogen is isolated by culture from two separate tissue or fluid samples obtained from the affected prosthetic joint |
| 1. Four of the following six criteria exist: |
| 1. Elevated ESR and CRP (ESR >30 mm/hour; CRP >10 mg/L) |
| 1. Elevated synovial fluid WBC count (>3000 cells/µL) |
| 1. Elevated synovial fluid neutrophil percentage (>65%) |
| 1. Presence of purulence in the affected joint |
| 1. Isolation of a microorganism in one periprosthetic tissue or fluid culture |
| 1. >5 neutrophils per high-powered field in 5 high-power fields observed from histologic analysis of periprosthetic tissue at 400X magnification |

Abbreviations: MSIS, Musculoskeletal Infection Society; PJI, periprosthetic joint infection; ESR, erythrocyte sedimentation rate; CRP, C-reactive protein; WBC, white blood cell.
